# Supplementary material
Source: PubMed Central journal article supplement (PMC7324504)
Supplement: supp_RA120.013530_159606_2_supp_525244_q9vnrr.pdf [file supp_RA120.013530_159606_2_supp_525244_q9vnrr.pdf]

## **Supporting Information**

### **Novel role of ASH1L histone methyltransferase in anaplastic thyroid carcinoma**

Bin Xu, Tingting Qin, Jingcheng Yu, Thomas J. Giordano, Maureen A. Sartor, Ronald J. Koenig

#### **Materials Included:**

Figure S1. The growth of ATC cell line BHT-101 is dependent on ASH1L expression.

Figure S2. The growth of ATC cell lines SW1736 and JEM493 is dependent on ASH1L.

Table S1. Differentially expressed genes, sorted by FDR, in ASH1L knockout BHT-101 cells compared to wild type BHT-101 cells.

Table S2. Enriched gene sets, sorted by FDR, in ASH1L knockout BHT-101 cells compared to wild type BHT-101 cells.

Table S3 is provided separately as an xlsx file. H3K36me2 ChIP-seq peaks present in BHT-101 wild type cells but absent in ASH1L knockout clones 1 and 4, and annotated to the differentially expressed genes in Figure 3 and Table S1.

Table S4. Real time PCR primers for human gene expression studies.

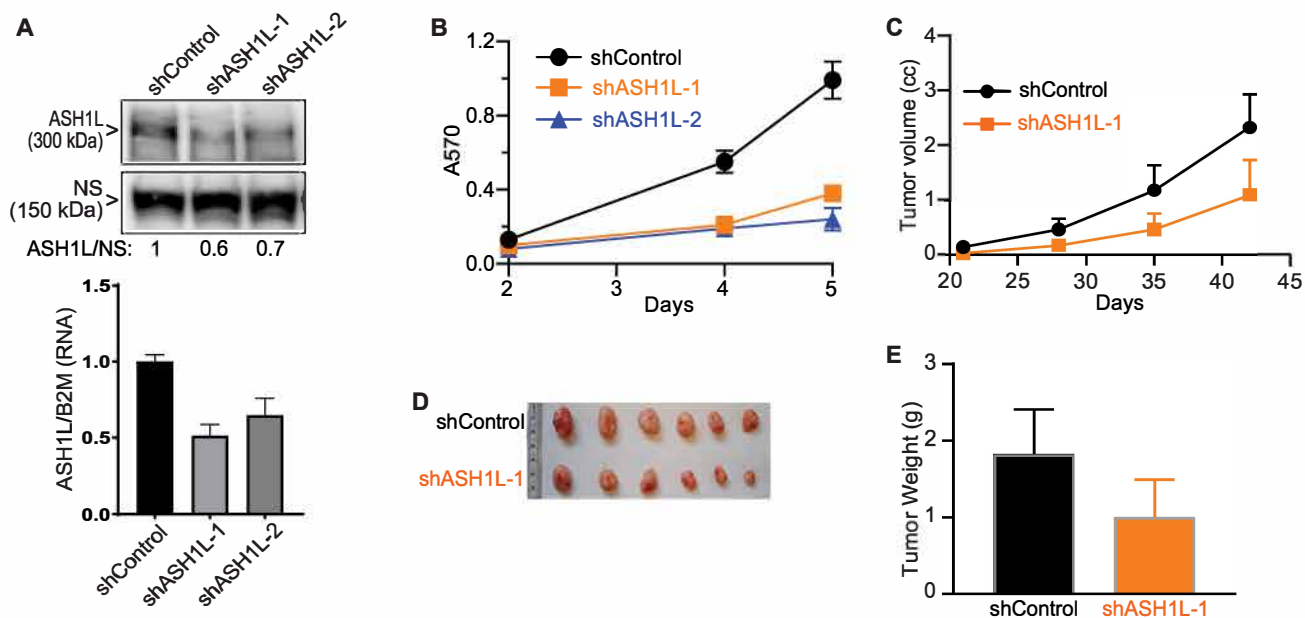

**Figure S1. The growth of ATC cell line BHT-101 is dependent on ASH1L expression.** *A, upper panel.* Western blot of ASH1L protein in BHT-101 cells expressing shControl or either of 2 shRNAs targeting ASH1L. The ASH1L band is 300 kDa. A non-specific band (NS, 150 kDa) serves as a loading control. *A, lower panel.* ASH1L mRNA expression analyzed by RT-qPCR and normalized to beta-2 microglobulin (B2M). *B.* MTT assay of BHT-101 shControl versus shASH1L cells. Data points are the mean  $\pm$ SD of sextuplet culture wells. Both shASH1L cell lines differ from shControl on days 4 and 5,  $p < 0.0001$ , Dunnett's test. *C.* BHT-101 shControl or shASH1L-1 cells were injected into the flanks of NOD-SCID mice,  $5 \times 10^6$  cells per injection and tumor volumes were estimated with calipers. Data points are the mean  $\pm$ SD of 6 mice per cell line. At each time point, shASH1L differs from shControl,  $p < 0.02$ ,  $t$  test with Holm-Sidak correction for multiple comparisons. *D.* The mice from panel C were sacrificed 42 days post-injection and the tumors were harvested. *E.* Tumor weights from panel D, mean  $\pm$ SD. The shASH1L tumors weigh less than shControl,  $p = 0.025$ , 2-tailed  $t$  test.

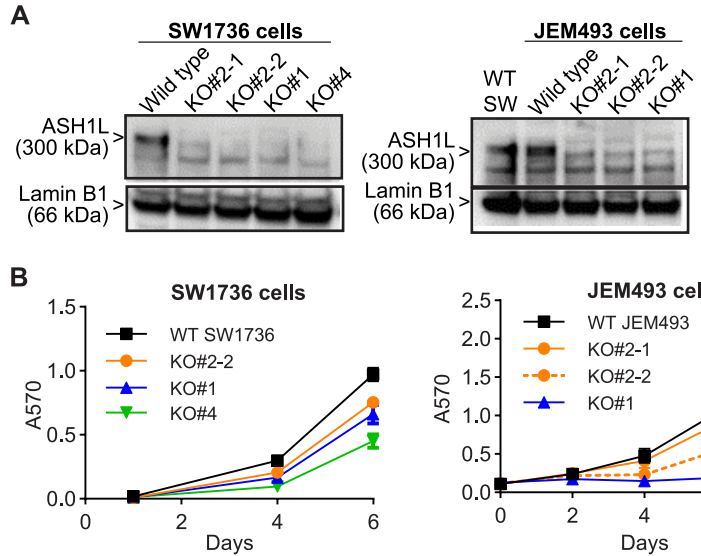

**Figure S2. The growth of ATC cell lines SW1736 and JEM493 is dependent on ASH1L.** **A.** ASH1L protein expression was knocked out of SW1736 cells using CRISPR-Cas9 and gRNAs 1, 2 and 4 from the BHT-101 cell knockout procedure, and was similarly knocked out of JEM493 cells using gRNAs 1 and 2. For each cell line, two independent clones were isolated using gRNA 2, denoted 2-1 and 2-2. Western blots of nuclear extracts confirm loss of ASH1L protein. The ASH1L band is 300 kDa, and Lamin B1 (66 kDa) is used as a loading control. A faint band in almost exactly the same position as ASH1L is detected in SW1736 KO cell line 2-1. The identity of this band is not known, and this cell line was not studied further. The first lane of the JEM493 Western blot is from wild type SW1736 cells (WT SW), to confirm the position of ASH1L in the JEM493 cells. **B.** The SW1736 and JEM493 cell lines with ASH1L KO grow more slowly than wild type cells in culture, assessed by MTT assay. Each data point represents the mean $\pm$ SD of sextuplicate wells. All KO lines are different than wild type at days 4 and beyond,  $p < 0.001$ , Dunnett's test, except JEM493 KO#2-1 is significant  $p < 0.001$  only on day 8.

**Table S1. Differentially expressed genes, sorted by FDR, in ASH1L knockout BHT-101 cells compared to wild type BHT-101 cells.** Differentially expressed genes are defined as having FDR<0.05 and absolute fold change >2 in the same direction in all 4 knockout cell clones versus 3 separate passages of wild type cells, analyzed by RNA-seq. Ten genes also were analyzed by RT-qPCR to confirm the RNA-seq results, shown in the last column.

| Gene symbol       | Log <sub>2</sub> Fold |                                   | <i>p</i> -Value | FDR      | RT-qPCR                      |
|-------------------|-----------------------|-----------------------------------|-----------------|----------|------------------------------|
|                   | Change                | log <sub>2</sub> CPM <sup>a</sup> |                 |          | Log <sub>2</sub> Fold Change |
| <i>SLC6A15</i>    | -8.01                 | 2.521                             | 1.56E-43        | 2.04E-39 | -7.79                        |
| <i>TSSC2</i>      | -5.93                 | 2.679                             | 6.27E-26        | 4.12E-22 | -2.60                        |
| <i>ONECUT3</i>    | -5.27                 | 0.313                             | 5.04E-22        | 2.21E-18 | -5.80                        |
| <i>RNF212</i>     | 3.31                  | 3.069                             | 8.54E-21        | 2.81E-17 |                              |
| <i>AC091801.1</i> | 8.04                  | 1.038                             | 1.81E-19        | 4.76E-16 |                              |
| <i>SLC1A1</i>     | 3.12                  | 3.660                             | 3.71E-18        | 8.13E-15 |                              |
| <i>GLB1L3</i>     | -4.87                 | -0.129                            | 3.30E-17        | 6.19E-14 |                              |
| <i>INPP4B</i>     | 4.14                  | 3.406                             | 4.20E-14        | 6.90E-11 |                              |
| <i>PTCHD4</i>     | 5.81                  | 1.401                             | 1.10E-13        | 1.60E-10 |                              |
| <i>HAPLN1</i>     | -5.08                 | 3.313                             | 1.34E-13        | 1.76E-10 | -5.59                        |
| <i>NUP210</i>     | 1.58                  | 7.340                             | 2.71E-13        | 3.24E-10 |                              |
| <i>VSTM2L</i>     | -2.45                 | 5.871                             | 2.84E-12        | 3.11E-09 |                              |
| <i>IGFBP7</i>     | 4.53                  | 1.972                             | 8.64E-11        | 7.18E-08 |                              |
| <i>MORC4</i>      | -2.14                 | 5.514                             | 8.74E-11        | 7.18E-08 |                              |
| <i>LRRC6</i>      | 2.84                  | 1.527                             | 1.37E-10        | 1.06E-07 |                              |
| <i>MMP16</i>      | 5.58                  | 2.957                             | 1.77E-10        | 1.30E-07 |                              |
| <i>GLI3</i>       | 2.58                  | 3.923                             | 3.22E-10        | 2.23E-07 |                              |
| <i>FBN1</i>       | 1.80                  | 4.762                             | 3.77E-10        | 2.48E-07 |                              |
| <i>PRICKLE1</i>   | 5.76                  | 3.756                             | 1.82E-09        | 1.01E-06 |                              |
| <i>ZNF827</i>     | 2.01                  | 3.451                             | 1.85E-09        | 1.01E-06 |                              |
| <i>FADS2</i>      | -1.62                 | 7.141                             | 4.92E-09        | 2.31E-06 |                              |
| <i>LDOC1</i>      | 3.14                  | 4.367                             | 4.77E-09        | 2.31E-06 |                              |
| <i>SPOCK1</i>     | 6.36                  | 5.402                             | 5.77E-09        | 2.62E-06 |                              |
| <i>ANKRD1</i>     | -2.10                 | 5.449                             | 6.94E-09        | 2.94E-06 |                              |
| <i>SLC46A1</i>    | 1.90                  | 3.595                             | 8.13E-09        | 3.34E-06 |                              |
| <i>COL4A2</i>     | 1.72                  | 6.931                             | 1.54E-08        | 6.12E-06 |                              |
| <i>TEX15</i>      | 4.21                  | 0.788                             | 2.22E-08        | 8.57E-06 |                              |
| <i>LAYN</i>       | 3.12                  | -0.098                            | 3.14E-08        | 1.14E-05 |                              |
| <i>ATP10D</i>     | 1.71                  | 4.054                             | 4.99E-08        | 1.73E-05 |                              |
| <i>BMP4</i>       | 1.95                  | 4.144                             | 5.66E-08        | 1.91E-05 |                              |
| <i>TOX2</i>       | 2.77                  | 3.862                             | 5.88E-08        | 1.92E-05 |                              |
| <i>PRKCZ</i>      | 2.52                  | 2.993                             | 8.66E-08        | 2.65E-05 |                              |
| <i>PTK7</i>       | 3.22                  | 3.005                             | 9.18E-08        | 2.74E-05 |                              |
| <i>COL7A1</i>     | 1.86                  | 6.419                             | 1.17E-07        | 3.34E-05 |                              |
| <i>STAC</i>       | 2.68                  | 5.209                             | 1.15E-07        | 3.34E-05 |                              |
| <i>NRP2</i>       | 2.04                  | 3.995                             | 1.33E-07        | 3.65E-05 |                              |
| <i>SCARA3</i>     | -1.60                 | 4.494                             | 1.64E-07        | 4.30E-05 |                              |
| <i>SHROOM2</i>    | 2.63                  | -0.252                            | 1.98E-07        | 4.92E-05 |                              |
| <i>ARHGAP10</i>   | 3.12                  | 2.959                             | 2.03E-07        | 4.95E-05 |                              |
| <i>DFNA5</i>      | 2.39                  | 3.184                             | 2.16E-07        | 5.08E-05 |                              |
| <i>STK32B</i>     | 4.63                  | 2.971                             | 2.94E-07        | 6.78E-05 |                              |
| <i>CCAT1</i>      | -6.10                 | 2.245                             | 3.32E-07        | 7.52E-05 | -6.97                        |
| <i>NUDT11</i>     | 2.20                  | 2.345                             | 3.44E-07        | 7.67E-05 |                              |

|                      |       |        |          |          |       |
|----------------------|-------|--------|----------|----------|-------|
| <i>NNMT</i>          | -2.88 | 5.768  | 4.07E-07 | 8.76E-05 | -3.31 |
| <i>AHRR</i>          | 2.62  | 3.323  | 4.49E-07 | 9.51E-05 |       |
| <i>AGPAT3</i>        | 2.23  | 4.088  | 5.01E-07 | 1.00E-04 |       |
| <i>FAM20C</i>        | 2.43  | 0.124  | 4.98E-07 | 1.00E-04 |       |
| <i>PEAR1</i>         | -2.06 | 4.364  | 5.03E-07 | 1.00E-04 |       |
| <i>SMIM3</i>         | 3.54  | 0.126  | 4.93E-07 | 1.00E-04 |       |
| <i>SYT14</i>         | 5.51  | 1.260  | 7.18E-07 | 1.37E-04 |       |
| <i>GPNMB</i>         | 2.00  | 0.068  | 7.49E-07 | 1.40E-04 |       |
| <i>CCDC80</i>        | 2.32  | 0.672  | 1.09E-06 | 1.97E-04 |       |
| <i>FGF1</i>          | 2.92  | 1.048  | 1.12E-06 | 1.97E-04 |       |
| <i>GCNT1</i>         | 4.05  | 0.998  | 1.25E-06 | 2.16E-04 |       |
| <i>TWSG1</i>         | -1.60 | 5.348  | 1.49E-06 | 2.48E-04 |       |
| <i>TRIB3</i>         | -1.66 | 7.718  | 2.19E-06 | 3.60E-04 |       |
| <i>FZD2</i>          | 2.65  | 1.652  | 2.29E-06 | 3.72E-04 |       |
| <i>FAM49A</i>        | 2.28  | 0.525  | 2.38E-06 | 3.81E-04 |       |
| <i>ADGRB2</i>        | 1.63  | 2.121  | 2.88E-06 | 4.46E-04 |       |
| <i>COL12A1</i>       | 6.39  | 2.555  | 3.00E-06 | 4.48E-04 |       |
| <i>COL4A1</i>        | 1.96  | 5.957  | 2.99E-06 | 4.48E-04 |       |
| <i>CSAG1</i>         | 3.10  | 1.293  | 3.13E-06 | 4.62E-04 |       |
| <i>CD3D</i>          | -4.74 | 2.005  | 3.25E-06 | 4.75E-04 |       |
| <i>FOXF1</i>         | 6.83  | 1.225  | 3.49E-06 | 4.98E-04 |       |
| <i>HLA-B</i>         | 3.40  | -0.030 | 3.71E-06 | 5.25E-04 |       |
| <i>MAP7</i>          | -1.72 | 0.690  | 4.13E-06 | 5.72E-04 |       |
| <i>ARAP2</i>         | 6.85  | 2.405  | 4.34E-06 | 5.82E-04 |       |
| <i>GAS6-AS1</i>      | 2.26  | 1.773  | 4.27E-06 | 5.82E-04 |       |
| <i>ZNF503</i>        | 1.84  | 0.768  | 4.45E-06 | 5.90E-04 |       |
| <i>HOXB8</i>         | -1.89 | 0.969  | 4.74E-06 | 6.23E-04 |       |
| <i>SLC27A2</i>       | 2.41  | 0.788  | 5.91E-06 | 7.61E-04 |       |
| <i>LIMD2</i>         | -1.41 | 3.626  | 6.07E-06 | 7.75E-04 |       |
| <i>RP11-115D19.1</i> | 5.21  | 0.374  | 6.77E-06 | 8.47E-04 |       |
| <i>SNAI2</i>         | 2.17  | 4.158  | 7.43E-06 | 9.21E-04 |       |
| <i>NPTXR</i>         | 2.69  | 1.331  | 8.17E-06 | 0.0010   |       |
| <i>PCDH10</i>        | 6.63  | 1.578  | 8.48E-06 | 0.0010   |       |
| <i>CTB-1121.1</i>    | 4.14  | 0.404  | 8.82E-06 | 0.0011   |       |
| <i>COL5A1</i>        | 2.84  | 6.164  | 9.01E-06 | 0.0011   |       |
| <i>LINC01021</i>     | 2.56  | 3.114  | 9.54E-06 | 0.0011   |       |
| <i>AC002480.3</i>    | -1.70 | 3.036  | 1.02E-05 | 0.0012   |       |
| <i>SAMD13</i>        | 1.85  | -0.328 | 1.07E-05 | 0.0012   |       |
| <i>SDK1</i>          | 8.82  | 4.255  | 1.19E-05 | 0.0013   |       |
| <i>LINC00173</i>     | -2.14 | 0.190  | 1.21E-05 | 0.0013   | -2.39 |
| <i>IL6</i>           | -1.87 | 1.131  | 1.23E-05 | 0.0013   | -1.74 |
| <i>ADAMTS14</i>      | 8.02  | 0.276  | 1.24E-05 | 0.0013   |       |
| <i>ITPRIPL1</i>      | -2.00 | 1.638  | 1.29E-05 | 0.0014   |       |
| <i>DTX3</i>          | 1.78  | 3.143  | 1.41E-05 | 0.0015   |       |
| <i>PCLO</i>          | 4.47  | 2.981  | 1.42E-05 | 0.0015   |       |
| <i>SOX9</i>          | 1.95  | 4.474  | 1.96E-05 | 0.0020   |       |
| <i>CPHLIP</i>        | -3.75 | 3.645  | 2.04E-05 | 0.0021   |       |
| <i>CLMP</i>          | 3.57  | 0.927  | 2.15E-05 | 0.0022   |       |
| <i>RASD2</i>         | 3.02  | 0.904  | 2.19E-05 | 0.0022   |       |
| <i>COL21A1</i>       | -2.31 | 0.517  | 2.26E-05 | 0.0022   |       |
| <i>SPECC1</i>        | 1.97  | 2.699  | 2.39E-05 | 0.0023   |       |

|                      |       |        |          |        |       |
|----------------------|-------|--------|----------|--------|-------|
| <i>VGLL3</i>         | -1.93 | 5.498  | 2.50E-05 | 0.0024 |       |
| <i>ARHGEF25</i>      | 1.60  | 1.055  | 2.62E-05 | 0.0024 |       |
| <i>NR2F1</i>         | -1.64 | 4.760  | 2.61E-05 | 0.0024 |       |
| <i>CASC15</i>        | -2.55 | 0.590  | 2.66E-05 | 0.0024 |       |
| <i>SUSD4</i>         | 4.40  | 0.385  | 3.06E-05 | 0.0028 |       |
| <i>ARSI</i>          | 3.88  | 0.083  | 3.11E-05 | 0.0028 |       |
| <i>BNC1</i>          | 5.43  | 1.659  | 3.33E-05 | 0.0029 |       |
| <i>DIRAS3</i>        | 5.03  | 0.175  | 3.33E-05 | 0.0029 |       |
| <i>FNDC10</i>        | 1.35  | 3.381  | 3.42E-05 | 0.0029 |       |
| <i>PPP1R14A</i>      | -2.31 | 3.057  | 3.42E-05 | 0.0029 |       |
| <i>TRABD2A</i>       | 2.33  | 3.270  | 3.39E-05 | 0.0029 |       |
| <i>ANXA10</i>        | 2.88  | 1.147  | 3.70E-05 | 0.0031 |       |
| <i>LVCAT1</i>        | 2.07  | 0.265  | 3.74E-05 | 0.0032 |       |
| <i>NLRC5</i>         | 2.32  | 1.498  | 3.79E-05 | 0.0032 |       |
| <i>HMOX1</i>         | -1.41 | 4.329  | 3.93E-05 | 0.0032 |       |
| <i>STARD13</i>       | 2.99  | 2.301  | 4.21E-05 | 0.0034 |       |
| <i>MBNL3</i>         | 1.75  | 2.863  | 4.63E-05 | 0.0038 |       |
| <i>MIR646HG</i>      | -1.56 | 0.335  | 4.90E-05 | 0.0039 |       |
| <i>GOLGA7B</i>       | -1.84 | 3.003  | 5.96E-05 | 0.0046 |       |
| <i>ADAM19</i>        | 2.43  | 3.638  | 6.11E-05 | 0.0047 |       |
| <i>LONRF2</i>        | 1.79  | 0.784  | 6.25E-05 | 0.0048 |       |
| <i>IGFBP1</i>        | -2.31 | 3.822  | 7.28E-05 | 0.0055 |       |
| <i>IFI27L2</i>       | 2.48  | -0.064 | 7.44E-05 | 0.0056 |       |
| <i>NAT8L</i>         | 2.76  | 1.054  | 7.44E-05 | 0.0056 |       |
| <i>NRGN</i>          | -1.20 | 3.262  | 7.74E-05 | 0.0056 |       |
| <i>MAGEA12</i>       | 2.95  | 2.461  | 8.16E-05 | 0.0059 |       |
| <i>PRDM9</i>         | -4.37 | 0.259  | 9.93E-05 | 0.0069 | -0.68 |
| <i>TRBC1</i>         | -1.95 | -0.037 | 1.08E-04 | 0.0074 |       |
| <i>CD9</i>           | -1.42 | 7.016  | 1.09E-04 | 0.0074 |       |
| <i>NHSL2</i>         | -2.78 | 3.826  | 1.35E-04 | 0.0088 |       |
| <i>NOV</i>           | 1.71  | 1.669  | 1.36E-04 | 0.0088 |       |
| <i>GAB1</i>          | 1.86  | 2.066  | 1.40E-04 | 0.0090 |       |
| <i>RP11-408N14.1</i> | -3.62 | 0.178  | 1.54E-04 | 0.0099 |       |
| <i>GRIK2</i>         | 2.54  | 1.349  | 1.56E-04 | 0.0099 |       |
| <i>CRYAB</i>         | -1.55 | 1.114  | 1.74E-04 | 0.0107 |       |
| <i>RNF208</i>        | 1.44  | 1.513  | 1.74E-04 | 0.0107 |       |
| <i>SEMA6B</i>        | 2.01  | 2.051  | 1.72E-04 | 0.0107 |       |
| <i>NKILA</i>         | 3.28  | 0.864  | 2.12E-04 | 0.0124 |       |
| <i>PAX9</i>          | -1.56 | 4.925  | 2.22E-04 | 0.0129 |       |
| <i>PNPLA3</i>        | 1.47  | 1.406  | 2.24E-04 | 0.0129 |       |
| <i>TUSC1</i>         | 2.03  | 2.974  | 2.25E-04 | 0.0129 |       |
| <i>LINC01929</i>     | -3.60 | -0.631 | 2.51E-04 | 0.0141 | -3.47 |
| <i>KCNAB3</i>        | -1.38 | -0.251 | 2.53E-04 | 0.0141 |       |
| <i>CLUHP3</i>        | 1.37  | 2.458  | 2.72E-04 | 0.0148 |       |
| <i>TLE4</i>          | 3.12  | 1.777  | 3.14E-04 | 0.0166 |       |
| <i>TRPA1</i>         | -1.75 | 5.798  | 3.46E-04 | 0.0179 |       |
| <i>RP11-369E15.3</i> | -3.48 | 2.623  | 3.60E-04 | 0.0183 |       |
| <i>TMEM204</i>       | -3.47 | 0.776  | 3.68E-04 | 0.0184 |       |
| <i>RP5-940J5.9</i>   | -1.29 | 1.845  | 4.21E-04 | 0.0207 |       |
| <i>CDK14</i>         | 2.26  | 2.225  | 4.37E-04 | 0.0210 |       |
| <i>IPCEF1</i>        | -1.86 | 0.596  | 4.66E-04 | 0.0220 |       |

|                     |       |        |          |        |
|---------------------|-------|--------|----------|--------|
| <i>ZSWIM5</i>       | -2.12 | 3.183  | 5.99E-04 | 0.0253 |
| <i>C9orf116</i>     | 1.13  | 2.377  | 6.19E-04 | 0.0258 |
| <i>CAPS2</i>        | 1.19  | 1.498  | 6.26E-04 | 0.0260 |
| <i>ITGB7</i>        | -2.34 | -0.034 | 8.42E-04 | 0.0319 |
| <i>WNT6</i>         | -1.47 | -0.365 | 9.05E-04 | 0.0334 |
| <i>ITGA11</i>       | 4.10  | 1.910  | 9.69E-04 | 0.0350 |
| <i>ASNS</i>         | -1.83 | 7.753  | 9.99E-04 | 0.0359 |
| <i>RP11-64D22.5</i> | 1.12  | 0.911  | 0.0011   | 0.0373 |
| <i>MCC</i>          | 3.53  | 1.308  | 0.0012   | 0.0409 |
| <i>CYP11A1</i>      | 3.14  | 1.392  | 0.0014   | 0.0438 |
| <i>TTC9</i>         | -1.73 | 3.390  | 0.0016   | 0.0494 |

<sup>a</sup>CPM, counts per million.

**Table S2. Enriched gene sets, sorted by FDR, in ASH1L knockout BHT-101 cells compared to wild type BHT-101 cells.**

| <b>Id</b>                                                                                     | <b>Name</b>                                                                                   | <b>Concept Type</b> | <b>P-Value</b> | <b>FDR</b> |
|-----------------------------------------------------------------------------------------------|-----------------------------------------------------------------------------------------------|---------------------|----------------|------------|
| GO:0030574                                                                                    | collagen catabolic process                                                                    | GOBP                | 9.98E-09       | 3.16E-05   |
| GO:0044243                                                                                    | multicellular organism catabolic process                                                      | GOBP                | 9.98E-09       | 3.16E-05   |
| GO:0001764                                                                                    | neuron migration                                                                              | GOBP                | 4.66E-08       | 7.38E-05   |
| GO:0055114                                                                                    | oxidation-reduction process                                                                   | GOBP                | 4.36E-08       | 7.38E-05   |
| GO:0044236                                                                                    | multicellular organism metabolic process                                                      | GOBP                | 1.87E-07       | 1.48E-04   |
| GO:0032963                                                                                    | collagen metabolic process                                                                    | GOBP                | 3.01E-07       | 1.80E-04   |
| GO:0044259                                                                                    | multicellular organismal macromolecule metabolic process                                      | GOBP                | 2.97E-07       | 1.80E-04   |
| GO:1903335                                                                                    | regulation of vacuolar transport                                                              | GOBP                | 3.43E-07       | 1.81E-04   |
| GO:0006082                                                                                    | organic acid metabolic process                                                                | GOBP                | 1.04E-06       | 4.37E-04   |
| GO:0044283                                                                                    | small molecule biosynthetic process                                                           | GOBP                | 1.38E-06       | 5.46E-04   |
| GO:0030198                                                                                    | extracellular matrix organization                                                             | GOBP                | 4.82E-06       | 1.39E-03   |
| GO:0043062                                                                                    | extracellular structure organization                                                          | GOBP                | 4.82E-06       | 1.39E-03   |
| c7.immunologic.all.GSE13411_NAIVE_VS_MEMORY_BCELL_UP                                          | c7.immunologic.all.GSE13411_NAIVE_VS_MEMORY_BCELL_UP                                          | Custom              | 5.85E-07       | 1.92E-03   |
| c7.immunologic.all.GSE37532_VISCERAL_ADIPOSE_TISSUE_VS_LN_DERIVED_PPARG_KO_TC0NV_CD4_TCELL_DN | c7.immunologic.all.GSE37532_VISCERAL_ADIPOSE_TISSUE_VS_LN_DERIVED_PPARG_KO_TCONV_CD4_TCELL_DN | Custom              | 7.91E-07       | 1.92E-03   |
| c7.immunologic.all.GSE19825_NAIVE_VS_DAY3_EFF_CD8_TCELL_UP                                    | c7.immunologic.all.GSE19825_NAIVE_VS_DAY3_EFF_CD8_TCELL_UP                                    | Custom              | 1.03E-06       | 1.92E-03   |
| GO:0010812                                                                                    | negative regulation of cell-substrate adhesion                                                | GOBP                | 9.58E-06       | 2.33E-03   |
| GO:0018205                                                                                    | peptidyl-lysine modification                                                                  | GOBP                | 1.25E-05       | 2.77E-03   |
| c7.immunologic.all.GSE22601_DOUBLE_NEGATIVE_VS_CD4_SINGLE_POSITIVE_THYMOCYTE_UP               | c7.immunologic.all.GSE22601_DOUBLE_NEGATIVE_VS_CD4_SINGLE_POSITIVE_THYMOCYTE_UP               | Custom              | 3.21E-06       | 4.48E-03   |
| GO:0032787                                                                                    | monocarboxylic acid metabolic process                                                         | GOBP                | 2.89E-05       | 5.39E-03   |
| GO:0035987                                                                                    | endodermal cell differentiation                                                               | GOBP                | 3.04E-05       | 5.50E-03   |
| hallmark.all.HALLMARK_OXIDATIVE_PHOSPHORYLATION                                               | hallmark.all.HALLMARK_OXIDATIVE_PHOSPHORYLATION                                               | Custom              | 6.62E-06       | 7.40E-03   |
| GO:1901657                                                                                    | glycosyl compound metabolic process                                                           | GOBP                | 5.03E-05       | 8.38E-03   |
| GO:0042278                                                                                    | purine nucleoside metabolic process                                                           | GOBP                | 5.51E-05       | 8.63E-03   |
| GO:0046128                                                                                    | purine ribonucleoside metabolic process                                                       | GOBP                | 5.51E-05       | 8.63E-03   |
| GO:0019752                                                                                    | carboxylic acid metabolic process                                                             | GOBP                | 5.73E-05       | 8.63E-03   |



|                                                                                      |                                                                                      |        |          |          |
|--------------------------------------------------------------------------------------|--------------------------------------------------------------------------------------|--------|----------|----------|
| GO:0043436                                                                           | oxoacid metabolic process                                                            | GOBP   | 5.73E-05 | 8.63E-03 |
| GO:0006631                                                                           | fatty acid metabolic process                                                         | GOBP   | 7.59E-05 | 9.77E-03 |
| GO:0009116                                                                           | nucleoside metabolic process                                                         | GOBP   | 8.12E-05 | 0.0101   |
| c7.immunologic.all.GSE2405_0H_VS_1.5H_A_PHAGOCYTOPHILUM_STIM_NEUTROPHIL_UP           | c7.immunologic.all.GSE2405_0H_VS_1.5H_A_PHAGOCYTOPHILUM_STIM_NEUTROPHIL_UP           | Custom | 1.09E-05 | 0.0102   |
| hsa04512                                                                             | ECM-receptor interaction                                                             | KEGG   | 2.53E-04 | 0.0108   |
| hsa00620                                                                             | Pyruvate metabolism                                                                  | KEGG   | 2.49E-04 | 0.0108   |
| c7.immunologic.all.GSE29618_PD_C_VS_MDC_DAY7_FLU_VACCINE_DN                          | c7.immunologic.all.GSE29618_PD_C_VS_MDC_DAY7_FLU_VACCINE_DN                          | Custom | 1.68E-05 | 0.0109   |
| c7.immunologic.all.GSE25087_FETAL_VS_ADULT_TREG_DN                                   | c7.immunologic.all.GSE25087_FETAL_VS_ADULT_TREG_DN                                   | Custom | 2.01E-05 | 0.0109   |
| c7.immunologic.all.GSE19198_1H_VS_6H_IL21_TREATED_TCELL_UP                           | c7.immunologic.all.GSE19198_1H_VS_6H_IL21_TREATED_TCELL_UP                           | Custom | 2.03E-05 | 0.0109   |
| c7.immunologic.all.GSE16451_CTRL_VS_WEST_EQUINE_ENC_VIRUS_MATURE_NEURON_CELL_LINE_DN | c7.immunologic.all.GSE16451_CTRL_VS_WEST_EQUINE_ENC_VIRUS_MATURE_NEURON_CELL_LINE_DN | Custom | 2.24E-05 | 0.0109   |
| c7.immunologic.all.GSE25123_CTRL_VS_IL4_STIM_MACROPHAGE_UP                           | c7.immunologic.all.GSE25123_CTRL_VS_IL4_STIM_MACROPHAGE_UP                           | Custom | 2.35E-05 | 0.0109   |
| c7.immunologic.all.GSE29164_DAY3_VS_DAY7_UNTREATED_MELANOMA_DN                       | c7.immunologic.all.GSE29164_DAY3_VS_DAY7_UNTREATED_MELANOMA_DN                       | Custom | 3.88E-05 | 0.0139   |
| c7.immunologic.all.GSE4811_CLASSSSICALY_ACTIVATED_VS_TYPE_2_ACTIVATED_MACROPHAGE_DN  | c7.immunologic.all.GSE4811_CLASSSSICALY_ACTIVATED_VS_TYPE_2_ACTIVATED_MACROPHAGE_DN  | Custom | 4.52E-05 | 0.0139   |
| c7.immunologic.all.GSE12839_CTRL_VS_IL12_TREATED_PBMC_DN                             | c7.immunologic.all.GSE12839_CTRL_VS_IL12_TREATED_PBMC_DN                             | Custom | 4.88E-05 | 0.0139   |
| c6.oncogenic.all.P53_DN.V1_UP                                                        | c6.oncogenic.all.P53_DN.V1_UP                                                        | Custom | 3.52E-05 | 0.0139   |
| c6.oncogenic.all.RAF_UP.V1_UP                                                        | c6.oncogenic.all.RAF_UP.V1_UP                                                        | Custom | 3.64E-05 | 0.0139   |
| c4.cgn.MORF_PTPRB                                                                    | c4.cgn.MORF_PTPRB                                                                    | Custom | 4.34E-05 | 0.0139   |
| GO:0009119                                                                           | ribonucleoside metabolic process                                                     | GOBP   | 1.35E-04 | 0.0155   |
| GO:0016042                                                                           | lipid catabolic process                                                              | GOBP   | 1.40E-04 | 0.0158   |
| GO:0071347                                                                           | cellular response to interleukin-1                                                   | GOBP   | 1.48E-04 | 0.0165   |
| c7.immunologic.all.GSE2405_0H_VS_9H_A_PHAGOCYTOPHILUM_STIM_NEUTROPHIL_DN             | c7.immunologic.all.GSE2405_0H_VS_9H_A_PHAGOCYTOPHILUM_STIM_NEUTROPHIL_DN             | Custom | 6.61E-05 | 0.0168   |
| c4.cgn.MORF_TNFRSF6                                                                  | c4.cgn.MORF_TNFRSF6                                                                  | Custom | 6.59E-05 | 0.0168   |
| GO:0070647                                                                           | protein modification by small protein conjugation or removal                         | GOBP   | 2.07E-04 | 0.0202   |
| GO:0072521                                                                           | purine-containing compound metabolic process                                         | GOBP   | 2.20E-04 | 0.0202   |
| GO:0016925                                                                           | protein sumoylation                                                                  | GOBP   | 2.13E-04 | 0.0202   |
| GO:0044711                                                                           | single-organism biosynthetic process                                                 | GOBP   | 2.17E-04 | 0.0202   |

|                                                                             |                                                                                                 |        |          |        |
|-----------------------------------------------------------------------------|-------------------------------------------------------------------------------------------------|--------|----------|--------|
| GO:0006409                                                                  | tRNA export from nucleus                                                                        | GOBP   | 2.36E-04 | 0.0202 |
| GO:0071431                                                                  | tRNA-containing ribonucleoprotein complex export from nucleus                                   | GOBP   | 2.36E-04 | 0.0202 |
| GO:0001706                                                                  | endoderm formation                                                                              | GOBP   | 2.30E-04 | 0.0202 |
| GO:0098927                                                                  | vesicle-mediated transport between endosomal compartments                                       | GOBP   | 2.43E-04 | 0.0205 |
| GO:0051031                                                                  | tRNA transport                                                                                  | GOBP   | 2.57E-04 | 0.0209 |
| GO:0045022                                                                  | early endosome to late endosome transport                                                       | GOBP   | 2.58E-04 | 0.0209 |
| GO:0043647                                                                  | inositol phosphate metabolic process                                                            | GOBP   | 2.61E-04 | 0.0209 |
| GO:0007492                                                                  | endoderm development                                                                            | GOBP   | 2.88E-04 | 0.0212 |
| GO:0090101                                                                  | negative regulation of transmembrane receptor protein serine/threonine kinase signaling pathway | GOBP   | 2.71E-04 | 0.0212 |
| GO:0071166                                                                  | ribonucleoprotein complex localization                                                          | GOBP   | 2.80E-04 | 0.0212 |
| GO:0046434                                                                  | organophosphate catabolic process                                                               | GOBP   | 2.85E-04 | 0.0212 |
| c7.immunologic.all.GSE24492_LYVE_NEG_VS_POS_MACROPHAGE_DN                   | c7.immunologic.all.GSE24492_LYVE_NEG_VS_POS_MACROPHAGE_DN                                       | Custom | 8.87E-05 | 0.0216 |
| GO:0071426                                                                  | ribonucleoprotein complex export from nucleus                                                   | GOBP   | 3.04E-04 | 0.0217 |
| GO:0034605                                                                  | cellular response to heat                                                                       | GOBP   | 3.05E-04 | 0.0217 |
| GO:0016053                                                                  | organic acid biosynthetic process                                                               | GOBP   | 3.11E-04 | 0.0218 |
| hsa03320                                                                    | PPAR signaling pathway                                                                          | KEGG   | 7.35E-04 | 0.0224 |
| GO:0003014                                                                  | renal system process                                                                            | GOBP   | 3.62E-04 | 0.0244 |
| GO:0006629                                                                  | lipid metabolic process                                                                         | GOBP   | 3.78E-04 | 0.0249 |
| GO:0072080                                                                  | nephron tubule development                                                                      | GOBP   | 4.17E-04 | 0.0262 |
| GO:0009126                                                                  | purine nucleoside monophosphate metabolic process                                               | GOBP   | 4.15E-04 | 0.0262 |
| GO:0009167                                                                  | purine ribonucleoside monophosphate metabolic process                                           | GOBP   | 4.15E-04 | 0.0262 |
| GO:0055086                                                                  | nucleobase-containing small molecule metabolic process                                          | GOBP   | 4.29E-04 | 0.0263 |
| c4.cgn.MORF_BRCA1                                                           | c4.cgn.MORF_BRCA1                                                                               | Custom | 1.29E-04 | 0.0274 |
| c4.cgn.MORF_MLLT10                                                          | c4.cgn.MORF_MLLT10                                                                              | Custom | 1.32E-04 | 0.0274 |
| c7.immunologic.all.GSE35543_IN_VITRO_ITREG_VS_CONVERTED_EX_ITREG_UP         | c7.immunologic.all.GSE35543_IN_VITRO_ITREG_VS_CONVERTED_EX_ITREG_UP                             | Custom | 1.39E-04 | 0.0275 |
| c7.immunologic.all.GSE25123_WT_VS_PPARG_KO_MACROPHAGE_ROSIGLITAZONE_STIM_DN | c7.immunologic.all.GSE25123_WT_VS_PPARG_KO_MACROPHAGE_ROSIGLITAZONE_STIM_DN                     | Custom | 1.51E-04 | 0.0275 |
| c7.immunologic.all.GSE22103_LPS_VS_GMCSF_AND_IFNG_STIM_NEUTROPHIL_UP        | c7.immunologic.all.GSE22103_LPS_VS_GMCSF_AND_IFNG_STIM_NEUTROPHIL_UP                            | Custom | 1.52E-04 | 0.0275 |
| c7.immunologic.all.GSE23984_CTRL_VS_HYPOCALEMIC_VITAMIND_ANALOG_TCELL_UP    | c7.immunologic.all.GSE23984_CTRL_VS_HYPOCALEMIC_VITAMIND_ANALOG_TCELL_UP                        | Custom | 1.53E-04 | 0.0275 |
| c7.immunologic.all.GSE21927_SPLEEN_MONOCYTE_VS_GMCSF_GCSF_BONE_MARROW_DN    | c7.immunologic.all.GSE21927_SPLEEN_MONOCYTE_VS_GMCSF_GCSF_BONE_MARROW_DN                        | Custom | 1.63E-04 | 0.0276 |
| c6.oncogenic.all.ALK_DN.V1_UP                                               | c6.oncogenic.all.ALK_DN.V1_UP                                                                   | Custom | 1.58E-04 | 0.0276 |
| GO:0060402                                                                  | calcium ion transport into cytosol                                                              | GOBP   | 4.84E-04 | 0.0278 |
| GO:0009408                                                                  | response to heat                                                                                | GOBP   | 4.91E-04 | 0.0280 |
| GO:0070555                                                                  | response to interleukin-1                                                                       | GOBP   | 4.98E-04 | 0.0281 |

|                                                                                                  |                                                                                              |        |          |        |
|--------------------------------------------------------------------------------------------------|----------------------------------------------------------------------------------------------|--------|----------|--------|
| c7.immunologic.all.GSE13411_SWI<br>TCHED_MEMORY_BCELL_VS_<br>PLASMA_CELL_DN                      | c7.immunologic.all.GSE13411_SWITCHED_ME<br>MORY_BCELL_VS_PLASMA_CELL_DN                      | Custom | 1.84E-04 | 0.0293 |
| c4.cgn.MORF_STK17A                                                                               | c4.cgn.MORF_STK17A                                                                           | Custom | 1.80E-04 | 0.0293 |
| GO:0022408                                                                                       | negative regulation of cell-cell adhesion                                                    | GOBP   | 5.46E-04 | 0.0297 |
| GO:0060401                                                                                       | cytosolic calcium ion transport                                                              | GOBP   | 5.50E-04 | 0.0297 |
| c7.immunologic.all.GSE30971_CT<br>RL_VS_LPS_STIM_MACROPHA<br>GE_WBP7_KO_2H_DN                    | c7.immunologic.all.GSE30971_CTRL_VS_LPS_S<br>TIM_MACROPHAGE_WBP7_KO_2H_DN                    | Custom | 1.94E-04 | 0.0302 |
| GO:0051168                                                                                       | nuclear export                                                                               | GOBP   | 5.69E-04 | 0.0305 |
| GO:0072523                                                                                       | purine-containing compound catabolic process                                                 | GOBP   | 5.82E-04 | 0.0307 |
| c7.immunologic.all.GSE25123_WT<br>_VS_PPARG_KO_MACROPHAG<br>E_DN                                 | c7.immunologic.all.GSE25123_WT_VS_PPARG_<br>KO_MACROPHAGE_DN                                 | Custom | 2.06E-04 | 0.0311 |
| c7.immunologic.all.GSE20500_CT<br>RL_VS_RETINOIC_ACID_TREA<br>TED_CD4_TCELL_DN                   | c7.immunologic.all.GSE20500_CTRL_VS_RETIN<br>OIC_ACID_TREATED_CD4_TCELL_DN                   | Custom | 2.12E-04 | 0.0312 |
| GO:0045598                                                                                       | regulation of fat cell differentiation                                                       | GOBP   | 6.19E-04 | 0.0313 |
| GO:2000021                                                                                       | regulation of ion homeostasis                                                                | GOBP   | 6.39E-04 | 0.0321 |
| GO:0070265                                                                                       | necrotic cell death                                                                          | GOBP   | 7.55E-04 | 0.0344 |
| GO:0030193                                                                                       | regulation of blood coagulation                                                              | GOBP   | 7.79E-04 | 0.0347 |
| GO:1900046                                                                                       | regulation of hemostasis                                                                     | GOBP   | 7.79E-04 | 0.0347 |
| GO:0006406                                                                                       | mRNA export from nucleus                                                                     | GOBP   | 7.93E-04 | 0.0348 |
| GO:0071427                                                                                       | mRNA-containing ribonucleoprotein complex<br>export from nucleus                             | GOBP   | 7.93E-04 | 0.0348 |
| GO:0009150                                                                                       | purine ribonucleotide metabolic process                                                      | GOBP   | 8.01E-04 | 0.0350 |
| GO:0032092                                                                                       | positive regulation of protein binding                                                       | GOBP   | 8.28E-04 | 0.0354 |
| GO:0051186                                                                                       | cofactor metabolic process                                                                   | GOBP   | 8.29E-04 | 0.0354 |
| hallmark.all.HALLMARK_MTOR<br>C1_SIGNALING                                                       | hallmark.all.HALLMARK_MTORC1_SIGNALIN<br>G                                                   | Custom | 2.49E-04 | 0.0357 |
| c7.immunologic.all.GSE29164_UN<br>TREATED_VS_CD8_TCELL_AN<br>D_IL12_TREATED_MELANOMA<br>_DAY7_DN | c7.immunologic.all.GSE29164_UNTREATED_VS<br>_CD8_TCELL_AND_IL12_TREATED_MELAN<br>OMA_DAY7_DN | Custom | 2.62E-04 | 0.0357 |
| c4.cgn.MORF_MAGEA8                                                                               | c4.cgn.MORF_MAGEA8                                                                           | Custom | 2.59E-04 | 0.0357 |
| hallmark.all.HALLMARK_EPITHE<br>LIAL_MESENCHYMAL_TRANSI<br>TION                                  | hallmark.all.HALLMARK_EPITHELIAL_MESE<br>NCHYMAL_TRANSITION                                  | Custom | 2.77E-04 | 0.0369 |
| GO:1900034                                                                                       | regulation of cellular response to heat                                                      | GOBP   | 8.76E-04 | 0.0371 |
| GO:0006475                                                                                       | internal protein amino acid acetylation                                                      | GOBP   | 8.84E-04 | 0.0371 |
| GO:0010522                                                                                       | regulation of calcium ion transport into cytosol                                             | GOBP   | 8.85E-04 | 0.0371 |
| GO:0030397                                                                                       | membrane disassembly                                                                         | GOBP   | 9.48E-04 | 0.0380 |
| GO:0051081                                                                                       | nuclear envelope disassembly                                                                 | GOBP   | 9.48E-04 | 0.0380 |
| c7.immunologic.all.GSE24142_DN<br>2_VS_DN3_THYMOCYTE_ADU<br>LT_UP                                | c7.immunologic.all.GSE24142_DN2_VS_DN3_T<br>HYMOCYTE_ADULT_UP                                | Custom | 3.00E-04 | 0.0389 |
| c6.oncogenic.all.PTEN_DN.V2_UP                                                                   | c6.oncogenic.all.PTEN_DN.V2_UP                                                               | Custom | 3.06E-04 | 0.0389 |
| GO:0016573                                                                                       | histone acetylation                                                                          | GOBP   | 0.00101  | 0.0399 |
| GO:0019751                                                                                       | polyol metabolic process                                                                     | GOBP   | 0.00102  | 0.0399 |
| GO:0006163                                                                                       | purine nucleotide metabolic process                                                          | GOBP   | 0.00104  | 0.0403 |
| c7.immunologic.all.GSE25087_TR<br>EG_VS_TCONV_FETUS_UP                                           | c7.immunologic.all.GSE25087_TREG_VS_TCON<br>V_FETUS_UP                                       | Custom | 3.34E-04 | 0.0415 |
| GO:0050818                                                                                       | regulation of coagulation                                                                    | GOBP   | 0.0011   | 0.0417 |

|                                                                                         |                                                                                         |        |          |        |
|-----------------------------------------------------------------------------------------|-----------------------------------------------------------------------------------------|--------|----------|--------|
| c7.immunologic.all.GSE35543_IN_VIVO_NTREG_VS_CONVERTED_EX_ITREG_DN                      | c7.immunologic.all.GSE35543_IN_VIVO_NTREG_VS_CONVERTED_EX_ITREG_DN                      | Custom | 3.81E-04 | 0.0444 |
| GO:0021953                                                                              | central nervous system neuron differentiation                                           | GOBP   | 0.00127  | 0.0474 |
| c7.immunologic.all.GSE12366_PLASMA_CELL_VS_NAIVE_BCELL_UP                               | c7.immunologic.all.GSE12366_PLASMA_CELL_VS_NAIVE_BCELL_UP                               | Custom | 4.37E-04 | 0.0481 |
| c7.immunologic.all.GSE26488_WT_VS_VP16_TRANSGENIC_HDAC7_KO_DOUBLE_POSITIVE_THYMOCYTE_DN | c7.immunologic.all.GSE26488_WT_VS_VP16_TRANSGENIC_HDAC7_KO_DOUBLE_POSITIVE_THYMOCYTE_DN | Custom | 4.38E-04 | 0.0481 |
| GO:0007077                                                                              | mitotic nuclear envelope disassembly                                                    | GOBP   | 0.0013   | 0.0482 |
| c7.immunologic.all.GSE6674_UNSTIM_VS_PL2_3_STIM_BCELL_UP                                | c7.immunologic.all.GSE6674_UNSTIM_VS_PL2_3_STIM_BCELL_UP                                | Custom | 4.53E-04 | 0.0485 |
| c6.oncogenic.all.CAHOY_ASTROGLIAL                                                       | c6.oncogenic.all.CAHOY_ASTROGLIAL                                                       | Custom | 4.60E-04 | 0.0485 |
| GO:0006913                                                                              | nucleocytoplasmic transport                                                             | GOBP   | 0.00133  | 0.0490 |
| GO:0045444                                                                              | fat cell differentiation                                                                | GOBP   | 0.00135  | 0.0491 |
| GO:0018393                                                                              | internal peptidyl-lysine acetylation                                                    | GOBP   | 0.00136  | 0.0491 |
| c7.immunologic.all.GSE17721_CTRL_VS_PAM3CSK4_8H_BMDC_UP                                 | c7.immunologic.all.GSE17721_CTRL_VS_PAM3CSK4_8H_BMDC_UP                                 | Custom | 4.75E-04 | 0.0492 |
| GO:0072009                                                                              | nephron epithelium development                                                          | GOBP   | 0.00138  | 0.0495 |
| c4.cgn.MORF_BCL2                                                                        | c4.cgn.MORF_BCL2                                                                        | Custom | 4.87E-04 | 0.0495 |

**Table S4. Real time PCR primers for human gene expression studies.**

| Gene symbol      | Forward primer           | Reverse primer         |
|------------------|--------------------------|------------------------|
| <i>ASH1L</i>     | CCAGGAAGGGCTGTGTTGAT     | CTGGTTACAGCATTGCTCGC   |
| <i>PGK1</i>      | AAGGGAAGCGGGTCGTTATG     | TGGGACAGCAGCCTTAATCC   |
| <i>CCAT1</i>     | AAGCAGGCAGAAAGCCGTAT     | TCAAATGGCCATCCACACCT   |
| <i>B2M</i>       | TAAGTGGGATCGAGACATGTAAGC | AATCCAAATGCGGCATCTTCAA |
| <i>SLC6A15</i>   | GCCTTGGGATCAGTGTCTT      | AGGTGGTGGCAGAACTTTGT   |
| <i>NNMT</i>      | GCACTCTGCAGAAAGCCAGA     | CAGCAGGTCTCCCTTCACAC   |
| <i>TSSC2</i>     | GCAGGAGCAGAACCCGAAT      | CAGCTCGCTCTGCACTGTTT   |
| <i>ONECUT3</i>   | GGATCCTGTGTCGCTCTCAG     | GATTTGAGCTTGCTCCACGG   |
| <i>HAPLN1</i>    | CTGTTGTGGTAGCACTGGACT    | GCCCCAGTCGTGGAAAGTAA   |
| <i>LINC01929</i> | GAACCATGGGTTGGCTCTGA     | TATGGGCTCCGGGAAAACAC   |
| <i>LINC00173</i> | CCAGAATCGGGGTGGATCAG     | CCTGCAGCACGCAATTAGAC   |
| <i>IL6</i>       | CCAGAGCTGTGCAGATGAGT     | ATTTGTGGTTGGGTCAGGGG   |
| <i>PRDM9</i>     | GCATCAAGTGGGGCAGCA       | AAAGGCCAGACAGCATGAGG   |
